# Supplementary material for: Adipose Stromal Cells-Derived Secretome Attenuates Cisplatin-Induced Injury In Vitro Surpassing the Intricate Interplay Between Proximal Tubular Epithelial Cells and Macrophages
Source: Preprints.org preprint supplement (doi:10.20944/preprints202312.0470.v1), 2023-12-07
Supplement: Supplementary file 1 [file supplementary]

**Supplementary Table 2. The concentrations of analytes in the co-culture supernatant measured using LUMINEX 200**

|  |  |  | Analytes (pg/ml) | | | | | | | | | | | | | | | | | | | | | |
| --- | --- | --- | --- | --- | --- | --- | --- | --- | --- | --- | --- | --- | --- | --- | --- | --- | --- | --- | --- | --- | --- | --- | --- | --- |
|  |  |  | HSP60 | IL-1b | MMP-9 | IP-10 (CXCL10) | IL-33 | TIMP-1 | IL-8  (CXCL8) | IL-10 | IFN-b | IL-13 | IL-1RA | Fractalkine  (CX3CL1) | Rantes  (CCL5) | GM-CSF | TNF-a | HGF | Arginase-1 | M-CSF | Survivin  (BIRC5) | VCAM-1 | S100A8/A9 | PDGF-BB |
| ciPTEC  Monoculture | UT-CTRL | Mean | 197 | BDL* | 1 | 4 | 10 | ADL# | 815 | 1 | BDL* | BDL* | BDL* | 2 | BDL* | 33 | BDL* | BDL* | BDL* | 15 | BDL* | 12 | BDL* | BDL* |
| SD | 12 | 0 | 0 | 0 | 0 | 0 | 906 | 0 | 0 | 0 | 0 | 0 | 0 | 10 | 0 | 0 | 0 | 0 | 0 | 3 | 0 | 0 |
| N | 3 | 3 | 3 | 3 | 3 | 3 | 3 | 3 | 3 | 3 | 3 | 3 | 3 | 3 | 3 | 3 | 3 | 3 | 3 | 3 | 3 | 3 |
| Cis-CTRL | Mean | 156 | BDL* | 4 | 4 | 11 | 65532 | 266 | 1 | 6 | 0 | BDL* | 2 | BDL* | 21 | 6 | 13 | 8 | 14 | BDL* | 8 | BDL* | 24 |
| SD | 23 | 0 | 4 | 1 | 1 | 0 | 90 | 0 | 0 | 0 | 0 | 1 | 0 | 4 | 0 | 0 | 0 | 2 | 0 | 0 | 0 | 0 |
| N | 3 | 3 | 3 | 3 | 3 | 3 | 3 | 3 | 3 | 3 | 3 | 3 | 3 | 3 | 3 | 3 | 3 | 3 | 3 | 3 | 3 | 3 |
| ciPTEC-Macrophage Co-culture | UT-CTRL | Mean | 2237 | 5 | 1577 | 22 | 25 | ADL# | 2178 | 10 | 27 | 17 | 5633 | 8 | 5 | 115 | 55 | 146 | 21 | ADL# | 307 | 31 | 13846 | 50 |
| SD | 451 | 2 | 147 | 8 | 7 | 0 | 242 | 5 | 10 | 4 | 4894 | 3 | 1 | 39 | 22 | 80 | 9 | 0 | 70 | 10 | 2783 | 13 |
| N | 3 | 3 | 3 | 3 | 3 | 3 | 3 | 3 | 3 | 3 | 3 | 3 | 3 | 3 | 3 | 3 | 3 | 3 | 3 | 3 | 3 | 3 |
| Cis-CTRL | Mean | 1515 | 3 | 1212 | 15 | 15 | ADL# | 2845 | 4 | 11 | 10 | 2654 | 5 | 3 | 61 | 27 | 97 | BDL* | ADL# | 216 | 19 | 11868 | 39 |
| SD | 241 | 1 | 498 | 4 | 3 | 0 | 2163 | 1 | 5 | 4 | 2412 | 1 | 1 | 18 | 9 | 48 | 0 | 0 | 56 | 5 | 1644 | 14 |
| N | 3 | 3 | 3 | 3 | 3 | 3 | 3 | 3 | 3 | 3 | 3 | 3 | 3 | 3 | 3 | 3 | 3 | 3 | 3 | 3 | 3 | 3 |
| Macrophage  Monoculture | UT-CTRL | Mean | 2608 | 4 | 1425 | 21 | 22 | 28393 | 1813 | 8 | 22 | 14 | 6435 | 6 | 4 | 97 | 44 | 140 | 17 | ADL# | 237 | 24 | 13483 | 45 |
| SD | 1131 | 2 | 510 | 5 | 6 | 17227 | 1152 | 3 | 8 | 4 | 7546 | 2 | 1 | 28 | 14 | 71 | 6 | 0 | 43 | 6 | 2998 | 7 |
| N | 3 | 3 | 3 | 3 | 3 | 3 | 3 | 3 | 3 | 3 | 3 | 3 | 3 | 3 | 3 | 3 | 3 | 3 | 3 | 3 | 3 | 3 |
| Cis-CTRL | Mean | 1915 | 2 | 1587 | 17 | 14 | 70966 | 3358 | 4 | 9 | 8 | 2964 | 3 | 3 | 54 | 22 | 100 | BDL* | 22 | 155 | 15 | 11947 | 35 |
| SD | 418 | 0 | 256 | 4 | 1 | 52589 | 2321 | 1 | 3 | 2 | 2685 | 1 | 1 | 7 | 2 | 51 | 0 | 0 | 2 | 1 | 1196 | 4 |
| N | 3 | 3 | 3 | 3 | 3 | 3 | 3 | 3 | 3 | 3 | 3 | 3 | 3 | 3 | 3 | 3 | 3 | 3 | 3 | 3 | 3 | 3 |
| ciPTEC  Monoculture | UT-CM | Mean | BDL* | BDL* | BDL* | 2 | 10 | ADL# | 312 | 1 | BDL* | BDL* | BDL* | BDL* | 1 | 26 | 7 | 217 | BDL* | ADL# | BDL* | 15 | BDL | 44 |
| SD | 0 | 0 | 0 | 0 | 0 | 0 | 102 | 0 | 0 | 0 | 0 | 0 | 0 | 6 | 0 | 20 | 0 | 0 | 0 | 3 | 0 | 6 |
| N | 3 | 3 | 3 | 3 | 3 | 3 | 3 | 3 | 3 | 3 | 3 | 3 | 3 | 3 | 3 | 3 | 3 | 3 | 3 | 3 | 3 | 3 |
| Cis-CM | Mean | BDL* | BDL* | BDL* | 3 | 10 | ADL# | 312 | 1 | BDL* | BDL* | BDL* | BDL* | 1 | 20 | 7 | 193 | BDL* | ADL# | BDL* | 12 | BDL | 48 |
| SD | 0 | 0 | 0 | 0 | 0 | 0 | 107 | 0 | 0 | 0 | 0 | 0 | 0 | 5 | 0 | 22 | 0 | 0 | 0 | 2 | 0 | 0 |
| N | 3 | 3 | 3 | 3 | 3 | 3 | 3 | 3 | 3 | 3 | 3 | 3 | 3 | 3 | 3 | 3 | 3 | 3 | 3 | 3 | 3 | 3 |
| ciPTEC-Macrophage Co-culture | UT-CM | Mean | BDL* | 4 | 65 | 9 | 16 | ADL# | 912 | 3 | 8 | 9 | 3719 | 3 | 2 | 47 | 24 | 197 | BDL* | ADL# | 245 | 20 | 5705 | 56 |
| SD | 0 | 0 | 24 | 6 | 6 | 0 | 474 | 2 | 0 | 7 | 2834 | 0 | 1 | 24 | 17 | 81 | 0 | 0 | 0 | 6 | 1496 | 7 |
| N | 3 | 3 | 3 | 3 | 3 | 3 | 3 | 3 | 3 | 3 | 3 | 3 | 3 | 3 | 3 | 3 | 3 | 3 | 3 | 3 | 3 | 3 |
| Cis-CM | Mean | BDL* | BDL* | 68 | 5 | 11 | ADL# | 975 | 2 | BDL* | 4 | 2082 | BDL* | 1 | 23 | 11 | 177 | BDL* | ADL# | BDL* | 14 | 6259 | 56 |
| SD | 0 | 0 | 18 | 1 | 0 | 0 | 318 | 1 | 0 | 0 | 1880 | 0 | 0 | 6 | 2 | 48 | 0 | 0 | 0 | 2 | 2200 | 10 |
| N | 3 | 3 | 3 | 3 | 3 | 3 | 3 | 3 | 3 | 3 | 3 | 3 | 3 | 3 | 3 | 3 | 3 | 3 | 3 | 3 | 3 | 3 |
| Macrophage  Monoculture | UT-CM | Mean | 95 | BDL* | 63 | 6 | 12 | ADL# | 635 | 2 | BDL* | 7 | 3158 | BDL* | 2 | 27 | 15 | 196 | BDL* | ADL# | 109 | 14 | 6333 | 52 |
| SD | 0 | 0 | 20 | 2 | 1 | 0 | 315 | 1 | 0 | 0 | 3193 | 0 | 1 | 10 | 6 | 61 | 0 | 0 | 0 | 2 | 1100 | 5 |
| N | 3 | 3 | 3 | 3 | 3 | 3 | 3 | 3 | 3 | 3 | 3 | 3 | 3 | 3 | 3 | 3 | 3 | 3 | 3 | 3 | 3 | 3 |
| Cis-CM | Mean | BDL* | BDL* | 62 | 5 | 12 | ADL# | 833 | 2 | BDL* | 5 | 1839 | BDL* | 2 | 21 | 13 | 182 | BDL* | ADL# | BDL* | 10 | 6203 | 53 |
| SD | 0 | 0 | 17 | 1 | 1 | 0 | 318 | 1 | 0 | 0 | 1437 | 0 | 0 | 3 | 2 | 39 | 0 | 0 | 0 | 1 | 542 | 7 |
| N | 3 | 3 | 3 | 3 | 3 | 3 | 3 | 3 | 3 | 3 | 3 | 3 | 3 | 3 | 3 | 3 | 3 | 3 | 3 | 3 | 3 | 3 |
| ciPTEC Medium | CTRL |  | BDL* | BDL* | BDL* | BDL* | 9 | BDL* | BDL* | 0 | BDL* | BDL* | BDL* | BDL* | N/A | BDL* | BDL* | BDL* | N/A | ADL# | BDL* | BDL* | BDL* | BDL* |
| CM | Mean | BDL* | BDL* | 2 | 6 | 10 | ADL# | 48 | 1 | BDL* | BDL* | BDL* | BDL* | 1 | 20 | 8 | 96 | BDL* | ADL# | N/A | 10 | BDL* | 38 |
| N (pooled) | 3 | 3 | 3 | 3 | 3 | 3 | 3 | 3 | 3 | 3 | 3 | 3 | 3 | 3 | 3 | 3 | 3 | 3 | 3 | 3 | 3 | 3 |
| Macrophage Medium | CTRL |  | BDL* | BDL* | BDL* | BDL* | 9 | N/A | BDL* | 0 | BDL* | BDL* | BDL* | BDL* | BDL* | BDL* | BDL* | BDL* | N/A | ADL# | BDL* | BDL* | BDL* | N/A |
| CM | Mean | BDL* | 2 | 2 | 15 | 22 | ADL# | 47 | 6 | 15 | 11 | BDL* | 3 | 2 | 83 | 37 | 431 | BDL* | ADL# | BDL* | 23 | BDL* | 69 |
| N (pooled) | 3 | 3 | 3 | 3 | 3 | 3 | 3 | 3 | 3 | 3 | 3 | 3 | 3 | 3 | 3 | 3 | 3 | 3 | 3 | 3 | 3 | 3 |

*BDL: below detection limit; #ADL: above detection limit; N/A: unquantifiable due to beads gating/doublets.
