# Supplementary material for: Adipose Stromal Cells-Derived Secretome Attenuates Cisplatin-Induced Injury In Vitro Surpassing the Intricate Interplay Between Proximal Tubular Epithelial Cells and Macrophages
Source: Preprints.org preprint supplement (doi:10.20944/preprints202312.0470.v1), 2023-12-07

## Supplementary Figure 5

**A** Correlation of SFM Thiol vs Apoptosis

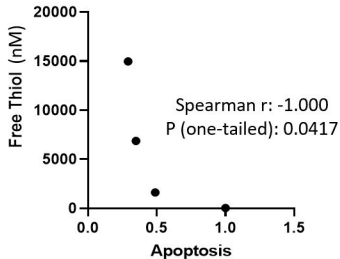

**B** Correlation of X-Vivo Thiol vs Phagocytosis

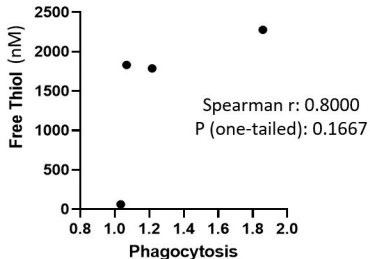

Supplement: Supplementary file 3 [file supplementary]
