# Supplementary material for: Adipose Stromal Cells-Derived Secretome Attenuates Cisplatin-Induced Injury In Vitro Surpassing the Intricate Interplay Between Proximal Tubular Epithelial Cells and Macrophages
Source: Preprints.org preprint supplement (doi:10.20944/preprints202312.0470.v1), 2023-12-07
Supplement: Supplementary file 8 [file supplementary]

Archive with 9 entries (9 files):
- Rendra et al ciPTEC-Mac_supplementary Table 1.docx
- Rendra et al ciPTEC-Mac_supplementary Table 2.docx
- Rendra et al_Supplementary Figure 1.pdf
- Rendra et al_Supplementary Figure 2.pdf
- Rendra et al_Supplementary Figure 3.pdf
- Rendra et al_Supplementary Figure 4.pdf
- Rendra et al_Supplementary Figure 5.pdf
- Rendra et al_Supplementary Figure 6.pdf
- Rendra et al_Supplementary Figure 7.pdf
