# Supplementary material for: Adipose Stromal Cells-Derived Secretome Attenuates Cisplatin-Induced Injury In Vitro Surpassing the Intricate Interplay Between Proximal Tubular Epithelial Cells and Macrophages
Source: Preprints.org preprint supplement (doi:10.20944/preprints202312.0470.v1), 2023-12-07
Supplement: Supplementary file 8 [file supplementary › Rendra et al ciPTEC-Mac_supplementary Table 1.docx]

**Supplementary Table 1. Primer sequences used for qPCR**

| **Gene** | **Primer Sequence (5'-3')** | |
| --- | --- | --- |
| GADD45A | F | GCTCAACGTAATCCACATTC |
| R | GAGATTAATCACTGGAACCC |
| CDKN1A | F | CAGCATGACAGATTTCTACC |
| R | CAGGGTATGTACATGAGGAG |
| HMOX1 | F | CAACAAAGTGCAAGATTCTG |
| R | TGCATTCACATGGCATAAAG |
| ATF3 | F | AGAAAGAGTCGGAGAAGC |
| R | TGAAGGTTGAGCATGTATATC |
| GAPDH | F | TCCACTGGCGTCTTCACC |
| R | GGCAGAGATGATGACCCTTTT |
