# Supplementary figures and images for: Adipose Stromal Cells-Derived Secretome Attenuates Cisplatin-Induced Injury In Vitro Surpassing the Intricate Interplay Between Proximal Tubular Epithelial Cells and Macrophages
Source: Preprints.org preprint supplement (doi:10.20944/preprints202312.0470.v1), 2023-12-07

# Supplementary Figure 3

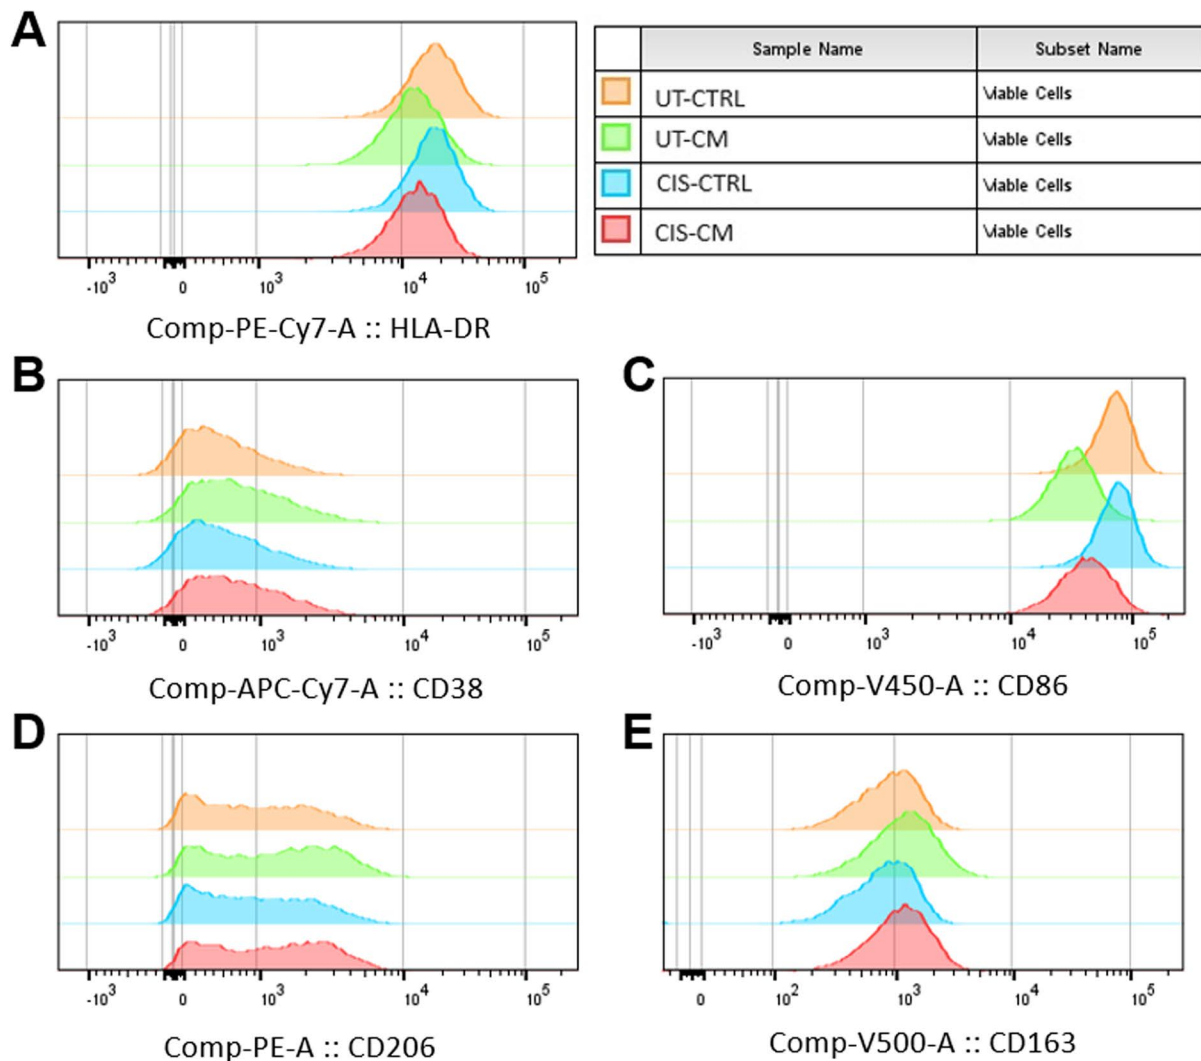

Supplement: Supplementary file 1 [file supplementary]

# Supplementary Figure 1

**A**

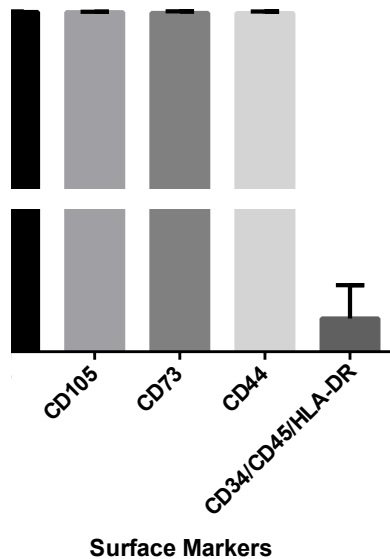

**B**

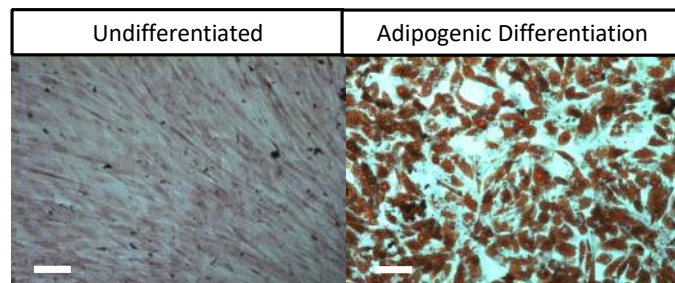

**C**

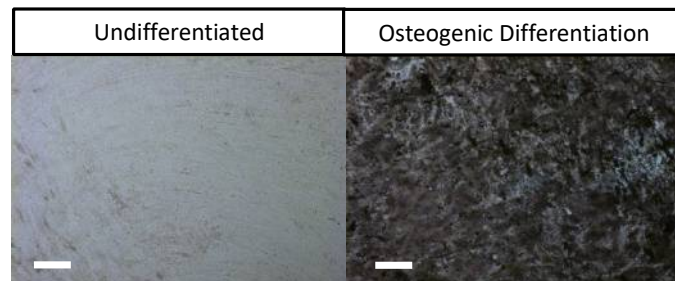

**D**

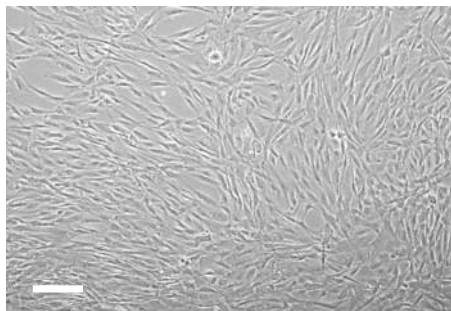

**E**

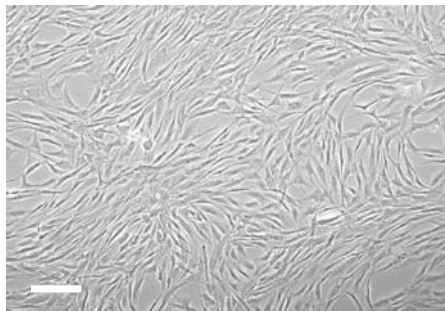

Supplement: Supplementary file 2 [file supplementary]

# Supplementary Figure 6

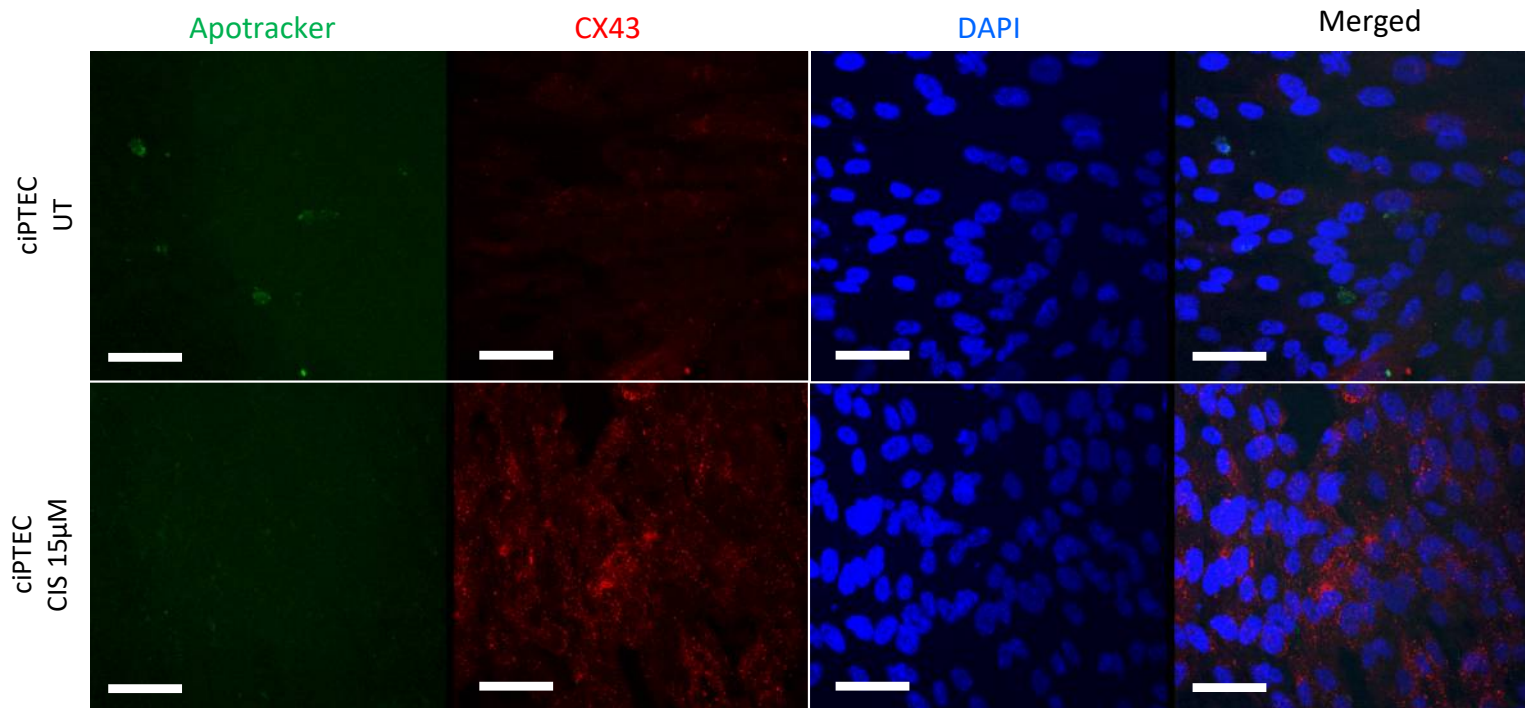

Supplement: Supplementary file 4 [file supplementary]

# Supplementary Figure 2

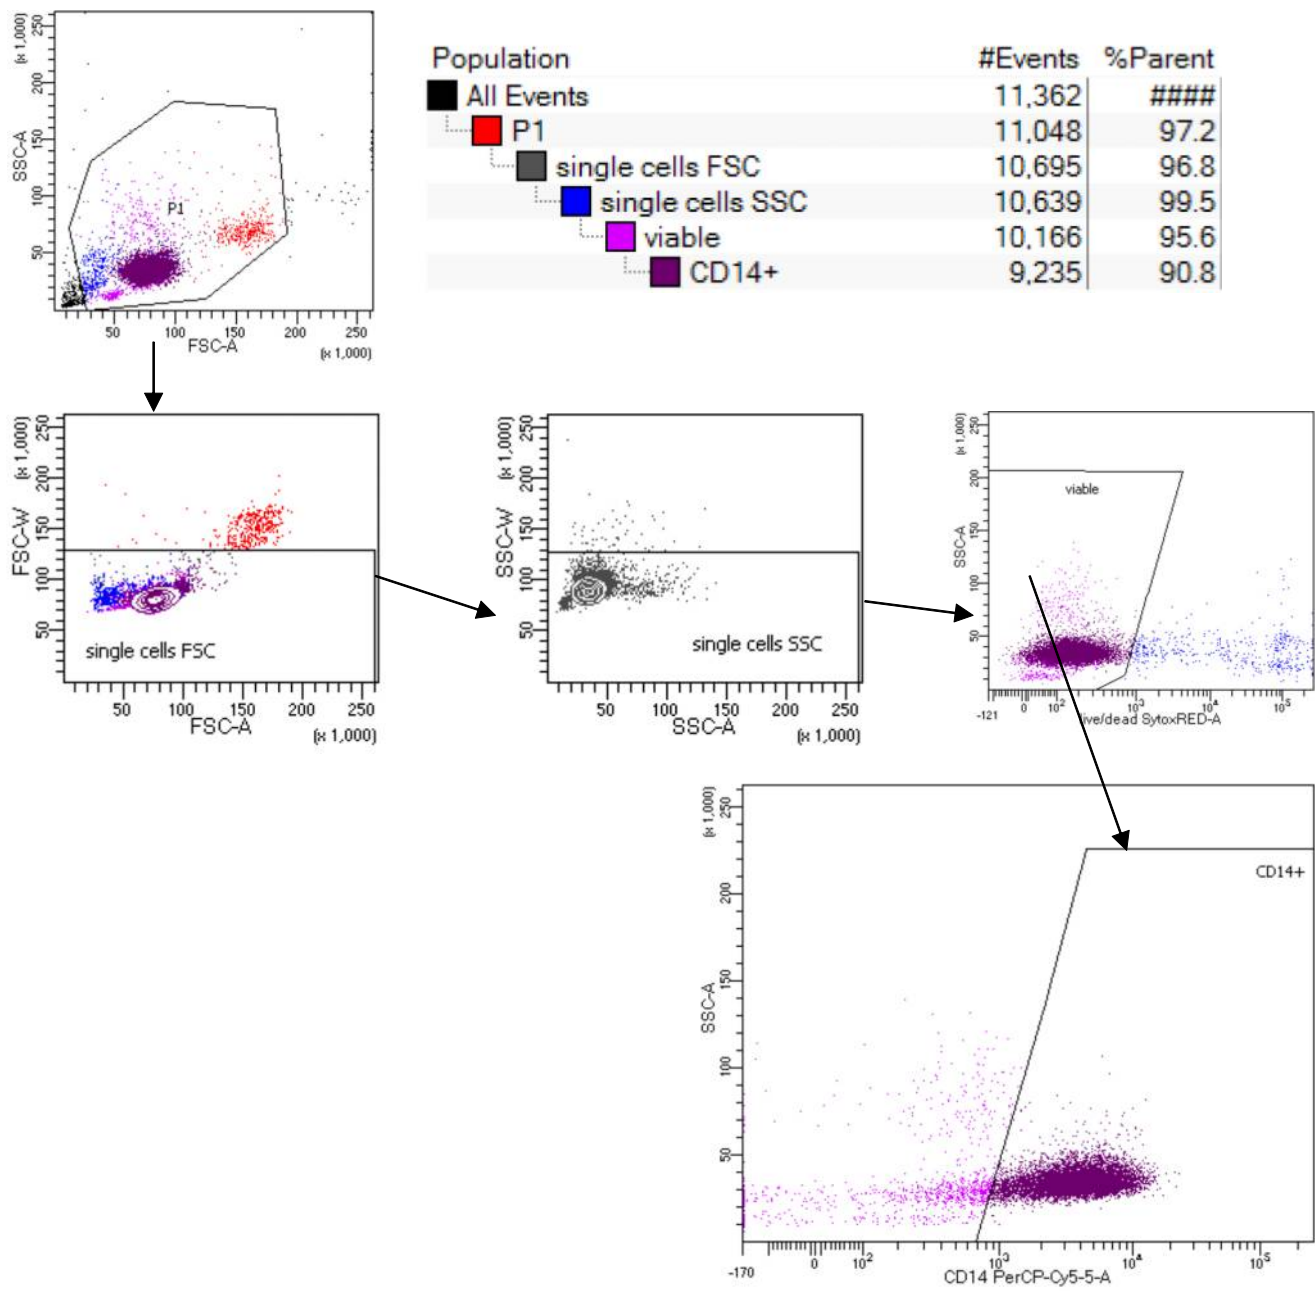

Supplement: Supplementary file 5 [file supplementary]

# Supplementary Figure 4

**A**

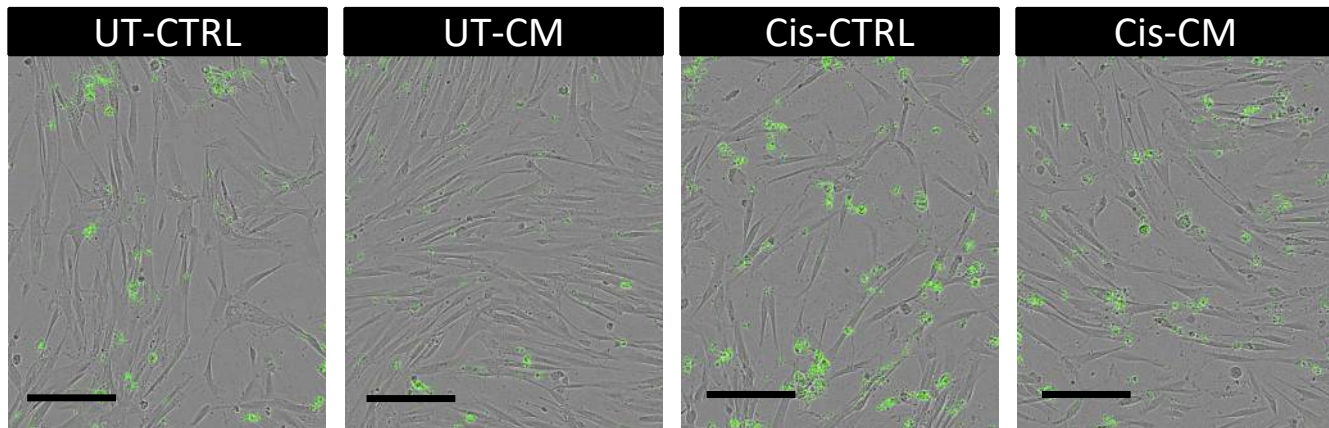

**B**

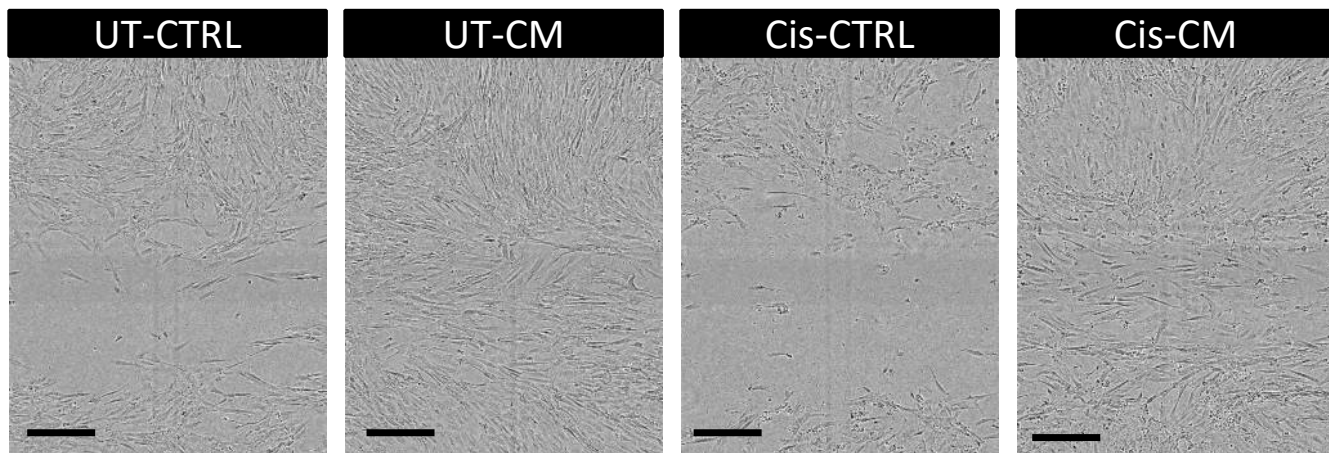

Supplement: Supplementary file 6 [file supplementary]

# Supplementary Figure 7

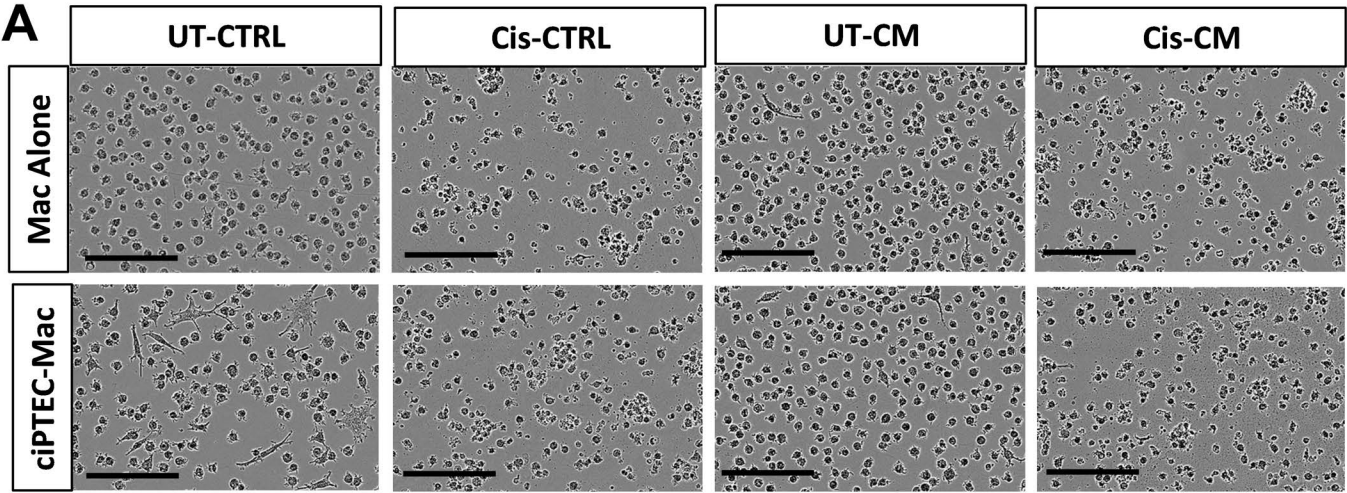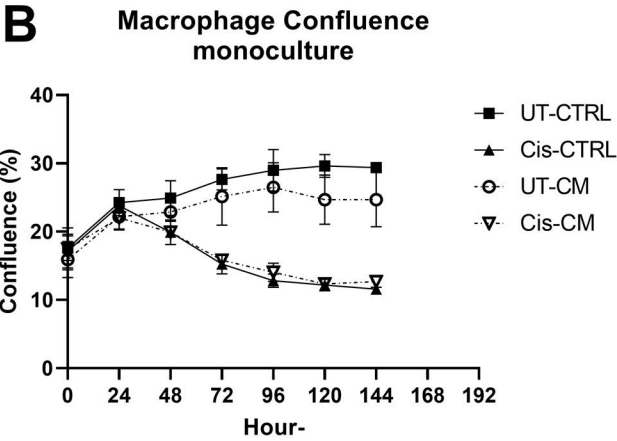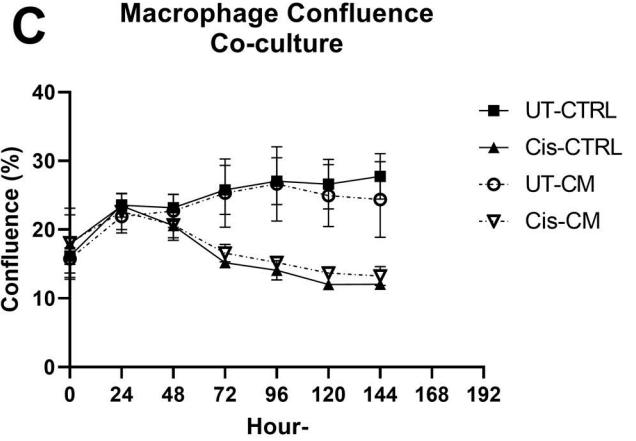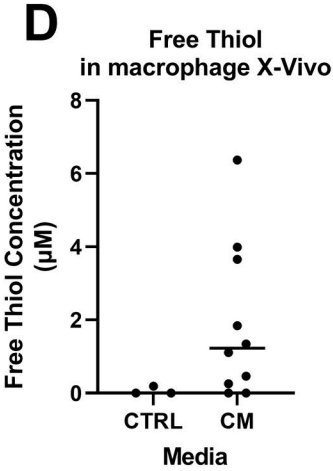

Supplement: Supplementary file 7 [file supplementary]
